# Supplementary material for: Efficiently normalizing leukopoiesis by gadofullerene nanoparticles to ameliorate radiation-triggered myelosuppression
Source: Royal Society of Chemistry journal article supplement (doi:10.1039/d3tb00599b), 2023-01-01
Supplement: d3tb00599b1.pdf [file d3tb00599b1.pdf]

## Supporting Information

### Efficiently normalizing leukopoiesis by gadofullerene nanoparticles to ameliorate radiation-triggered myelosuppression

Wang Jia,<sup>a, b</sup> Xue Li,<sup>a, b</sup> Tian Zhang,<sup>c</sup> Chunru Wang,<sup>a, b</sup> and Mingming Zhen<sup>a, b \*</sup>

<sup>a</sup>Beijing National Laboratory for Molecular Sciences, Key Laboratory of Molecular Nanostructure and Nanotechnology, Institute of Chemistry, Chinese Academy of Sciences, Beijing 100190, China;

<sup>b</sup>University of Chinese Academy of Sciences, Beijing 100049, China.

<sup>c</sup>Beijing ChaoYang Hospital, Beijing 100020, China.

\*Corresponding Author E-mail: zhenmm@iccas.ac.cn

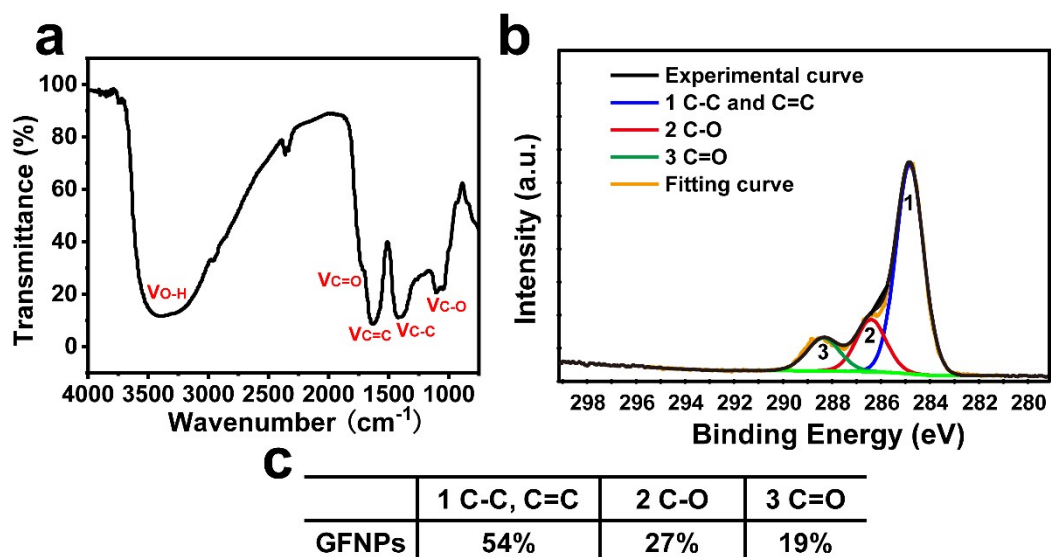

**Fig. S1** Characterization of GFNPs. (a) FT-IR data of GFNPs. (b-c) XPS spectrum and relative atomic percent contents of different C1s of GFNPs.

**Table S1.** The hydrodynamic parameters including average size, polydispersity index (PDI) and Zeta potential of GFNPs.

| Hydrodynamic parameters | GFNPs       |
|-------------------------|-------------|
| Size (d.nm)             | 130.70±1.70 |
| PDI                     | 0.20±0.07   |
| Zeta potential (mV)     | -41.70±0.36 |

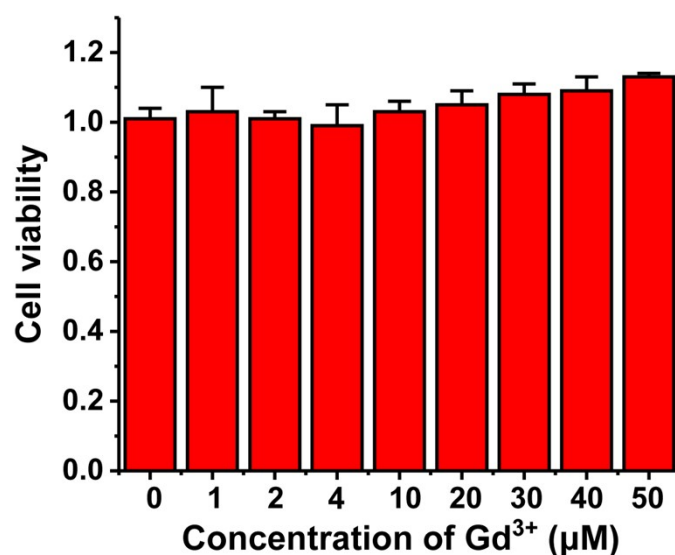

**Fig. S2** The cell viability of FDC-P1 cells after treated with different concentrations of GFNPs (0, 1, 2, 4, 10, 20, 30, 40, 50 µM). (n=5).

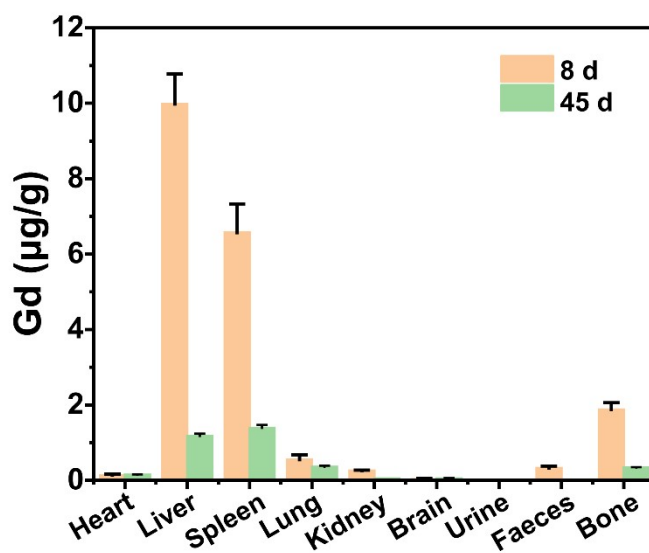

**Fig. S3** The biodistribution of GFNPs *in vivo*.

**Table S2.** Information of the main antibodies.

| Main Antibodies                      | Supplier    | Identifier           |
|--------------------------------------|-------------|----------------------|
| Mouse Hematopoietic Lineage Antibody | eBioscience | Catalog # 88-7772-72 |
| Anti-Mouse CD117 (c-Kit)             | eBioscience | Catalog # 25-1171-82 |
| IgM Monoclonal Antibody              | eBioscience | Catalog # 25-5790-82 |
| CD45R (B220) Monoclonal Antibody     | eBioscience | Catalog # 11-0452-81 |
| CD43 Monoclonal Antibody             | eBioscience | Catalog # 12-0431-81 |
| CD19 Monoclonal Antibody             | eBioscience | Catalog # 45-0193-80 |
| FITC anti-mouse CD45 Antibody        | BioLegend   | Catalog # 103108     |
| Anti-mouse Ly-6G/Ly-6C Antibody      | BioLegend   | Catalog # 108428     |
